# Supplementary material for: Influence of vintage, geographic location and cultivar on the structure of microbial communities associated with the grapevine rhizosphere in vineyards of San Juan Province, Argentina
Source: PLOS journal article supplement (doi:10.1371/journal.pone.0243848), 2020-12-14
Supplement: S3 (10.1371/journal.pone.0243848.s003) [file journal.pone.0243848.s003]

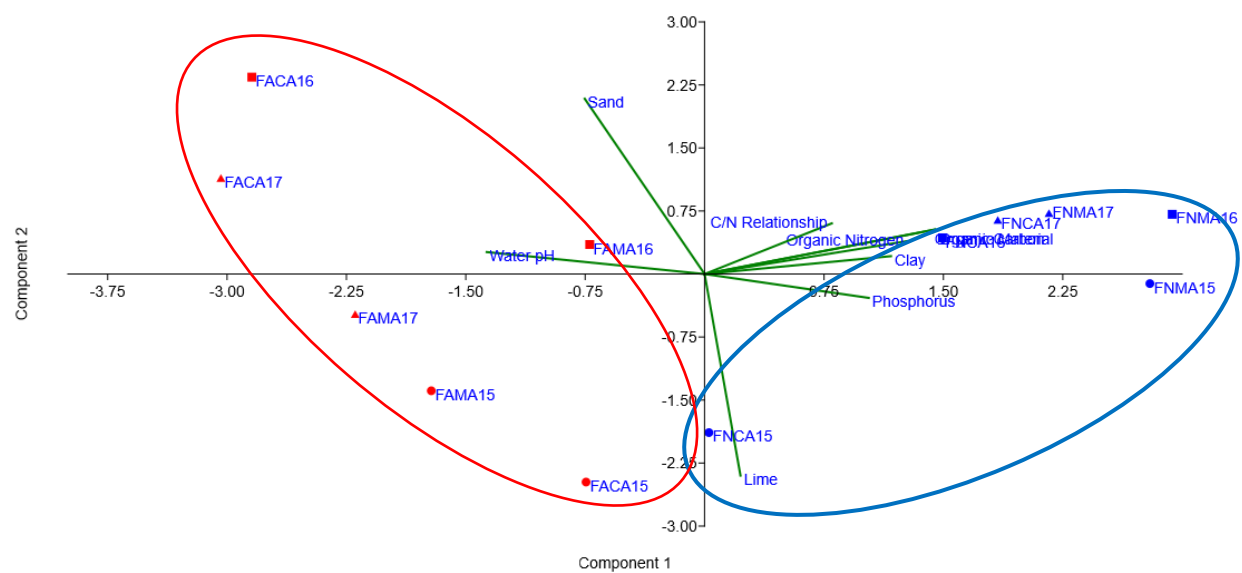

**S3 Fig. Principal Component Analysis (PCA) of the soils' physical and chemical properties.**
